# Supplementary material for: Complementary Nucleobase Interactions Drive Co-Assembly of Drugs and Nanocarriers for Selective Cancer Chemotherapy
Source: MDPI journal article supplement (doi:10.3390/pharmaceutics13111929), 2021-11-15
Supplement: s1 [file s1]

# Supplementary Materials: Complementary Nucleobase Interactions Drive Co-Assembly of Drugs and Nanocarriers for Selective Cancer Chemotherapy

Fasih Bintang Ilhami, Enyew Alemayehu Bayle and Chih-Chia Cheng

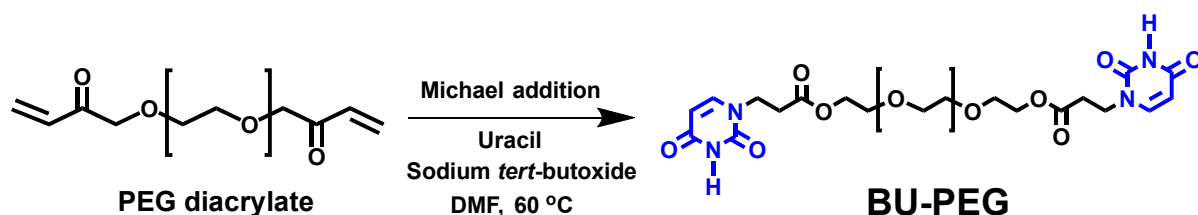

Scheme S1. Process for the synthesis of BU-PEG.

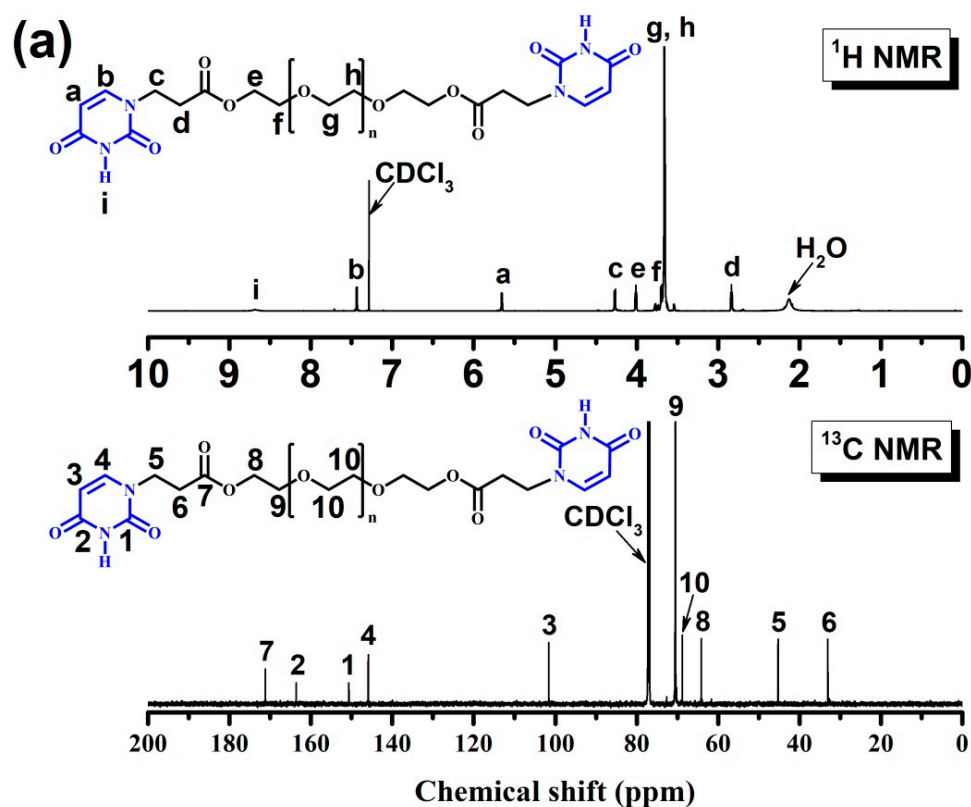

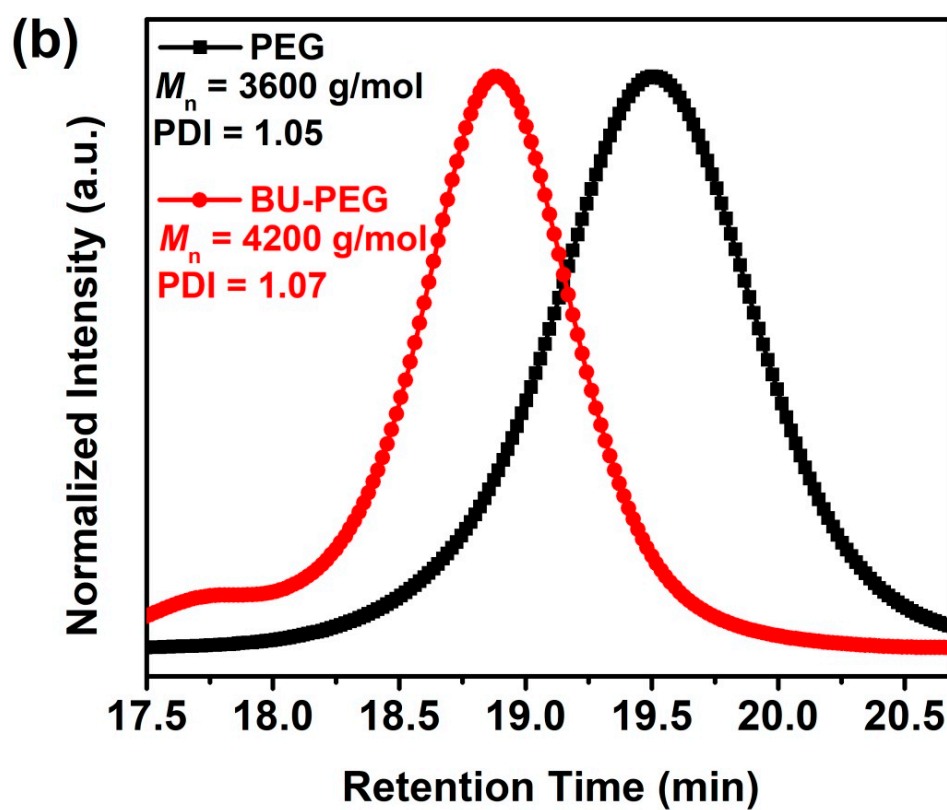

Figure S1. (a)  $^1\text{H}$  and  $^{13}\text{C}$  NMR spectra of BU-PEG in  $\text{CDCl}_3$  obtained at 25 °C. (b) GPC curves for PEG and BU-PEG in THF at 40 °C.

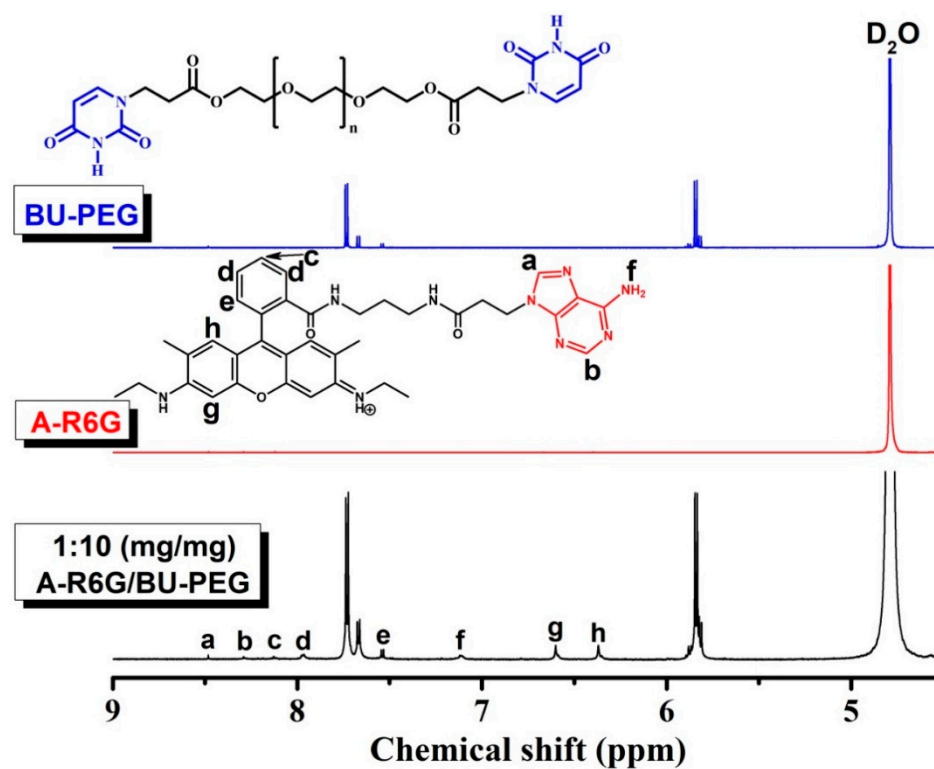

Figure S2.  $^1\text{H}$  NMR spectra of BU-PEG, A-R6G, and A-R6G/BU-PEG complexes in  $\text{D}_2\text{O}$  obtained at 25 °C.

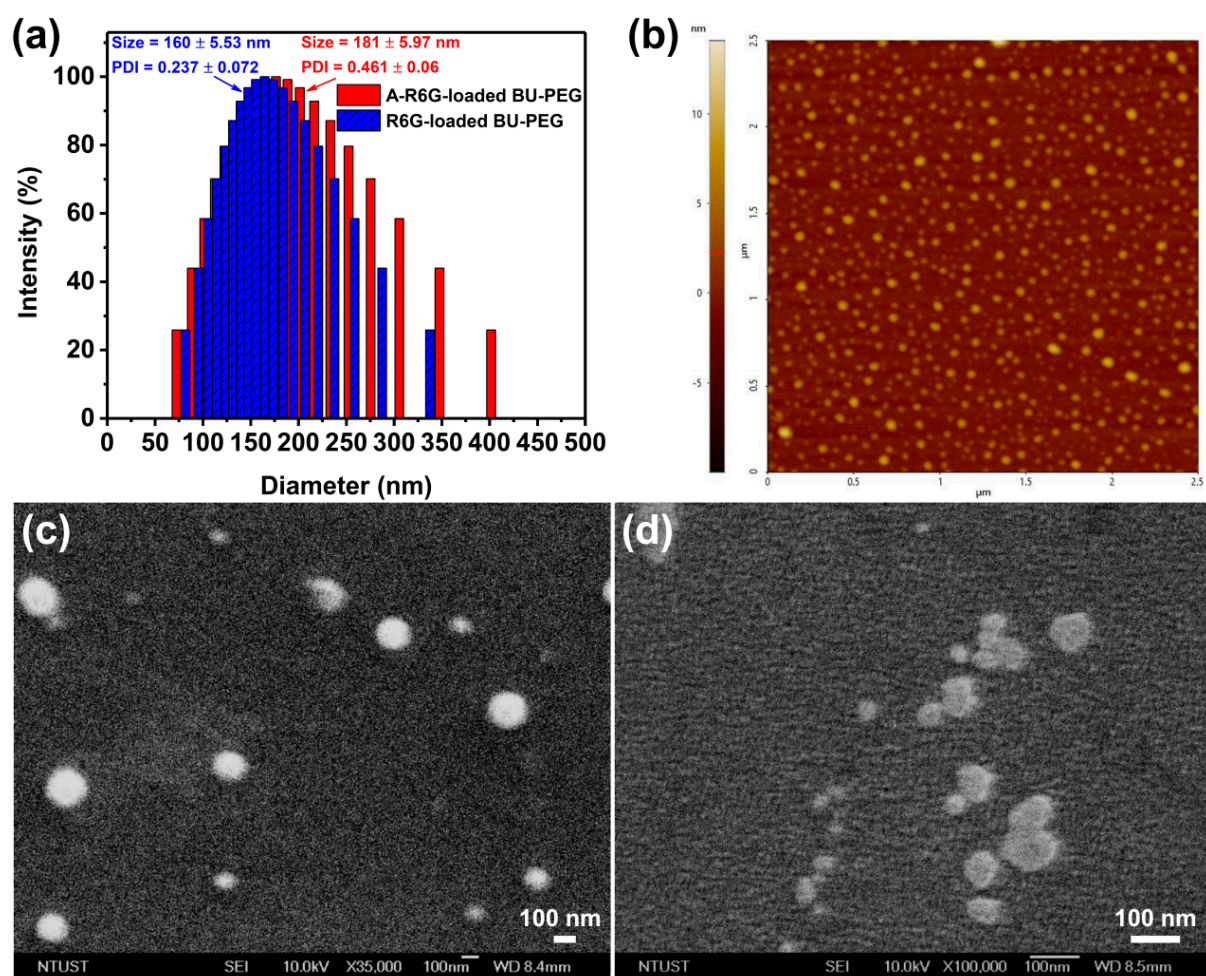

**Figure S3.** (a) DLS profiles for A-R6G-loaded and R6G-loaded BU-PEG nanogels in water at 25 °C. (b) AFM image of R6G-loaded BU-PEG. SEM images of (c) A-R6G-loaded BU-PEG and (d) R6G-loaded BU-PEG nanogels.

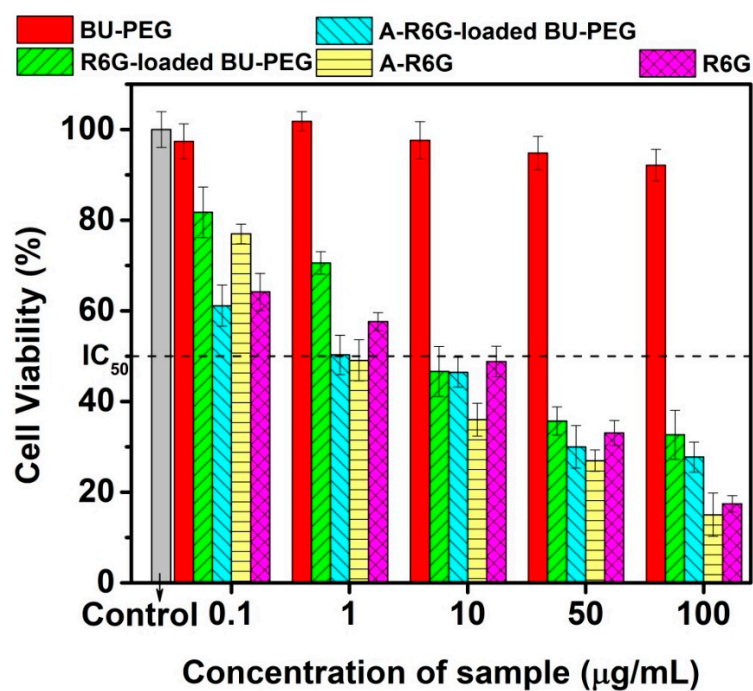

**Figure S4.** *In vitro* MTT assay cytotoxicity of BU-PEG, A-R6G, R6G, and A-R6G-loaded and R6G-loaded BU-PEG nanogels towards MG-63 cells.

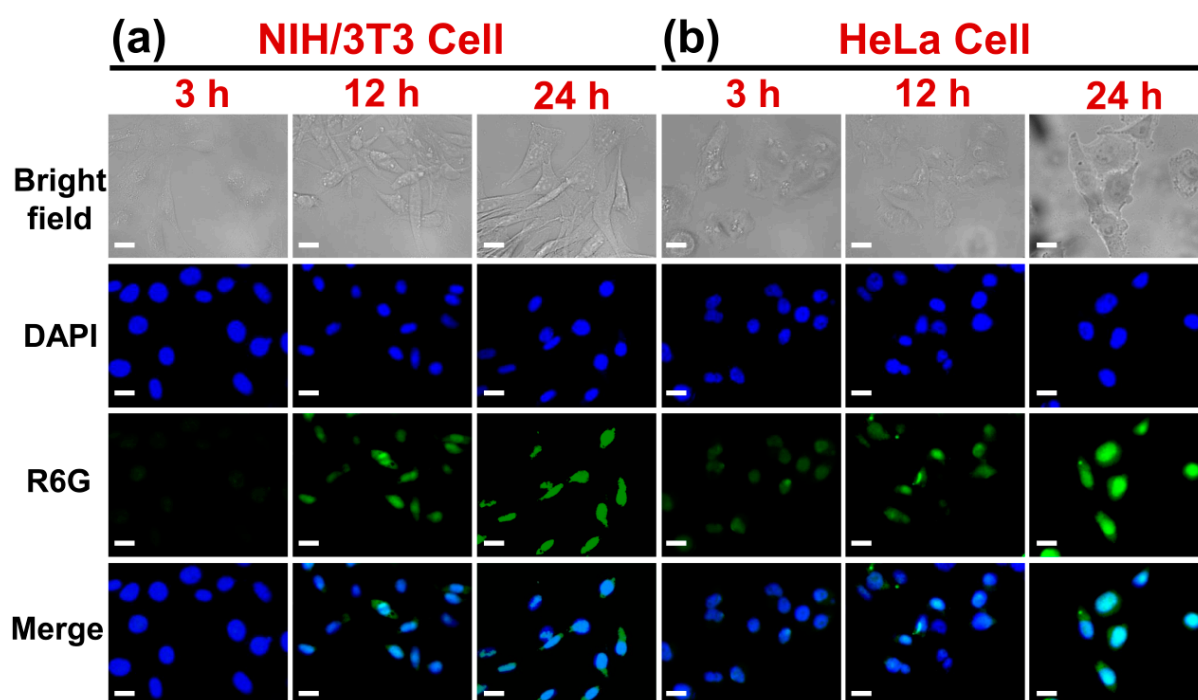

**Figure S5.** CLSM images of (a) NIH/3T3 cells and (b) HeLa cells cultured with R6G-loaded BU-PEG nanogels at normal physiological conditions (pH 7.4 and 37 °C) for 3 h, 12 h, or 24 h. The scale bars in all CLSM images are 20 μm.

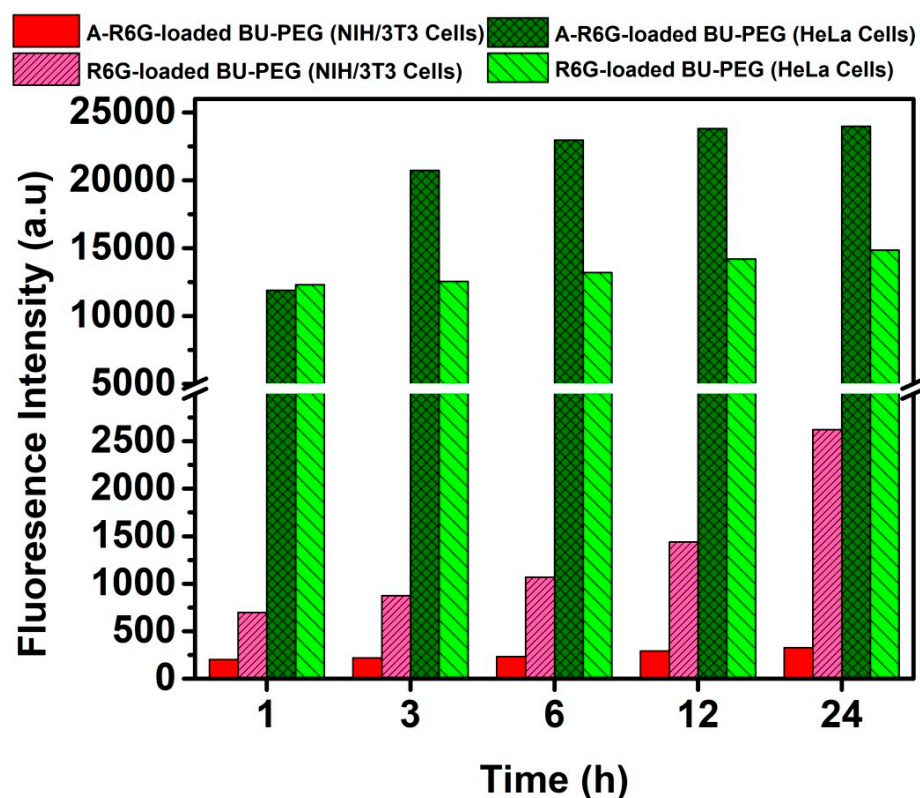

**Figure S6.** Fluorescence intensity of NIH/3T3 and HeLa cells after incubation with A-R6G-loaded and R6G-loaded BU-PEG nanogels for different periods of time (1, 3, 6, 12, or 24 h).

**Table S1.** Hydrodynamic particle size, zeta potential, drug-loading content (DLC) and drug-loading efficiency (DLE) of A-R6G-loaded and R6G-loaded BU-PEG nanogels.

| A-R6G-loaded sample | Drug:Carrier<br>(weight ratio) | Particle Size   | Zeta Potential (mV) | DLC $\pm$ SD (%) | DLE $\pm$ SD (%) |
|---------------------|--------------------------------|-----------------|---------------------|------------------|------------------|
| BU-PEG              | -                              | 85.9 $\pm$ 4.67 | 4.31 $\pm$ 4.47     | -                | -                |
| A-R6G/BU-PEG        | 0.2:1                          | 102 $\pm$ 6.13  | -38.29 $\pm$ 6.44   | 37.19 $\pm$ 1.76 | 55.23 $\pm$ 4.15 |
|                     | 0.5:1                          | 148 $\pm$ 5.09  | -40.37 $\pm$ 5.95   | 55.50 $\pm$ 1.81 | 46.83 $\pm$ 1.30 |
|                     | 1:1                            | 181 $\pm$ 5.97  | -51.21 $\pm$ 3.66   | 69.04 $\pm$ 2.89 | 33.76 $\pm$ 1.48 |
| R6G/BU-PEG          | 0.2:1                          | 108 $\pm$ 4.93  | 12.47 $\pm$ 6.94    | 18.45 $\pm$ 1.77 | 70.32 $\pm$ 2.45 |
|                     | 0.5:1                          | 123 $\pm$ 7.58  | 13.32 $\pm$ 6.04    | 20.14 $\pm$ 2.07 | 59.83 $\pm$ 1.46 |
|                     | 1:1                            | 160 $\pm$ 5.53  | 19.29 $\pm$ 5.11    | 22.67 $\pm$ 3.45 | 43.71 $\pm$ 4.43 |
